# Supplementary material for: Molecular Approaches to Identify Cryptic Species and Polymorphic Species within a Complex Community of Fig Wasps
Source: PubMed Central journal article supplement (PMC2993961; doi:10.1371/journal.pone.0015067), 2010-11-29
Supplement: pone.0015067.s001.pdf [file pone.0015067.s001.pdf]

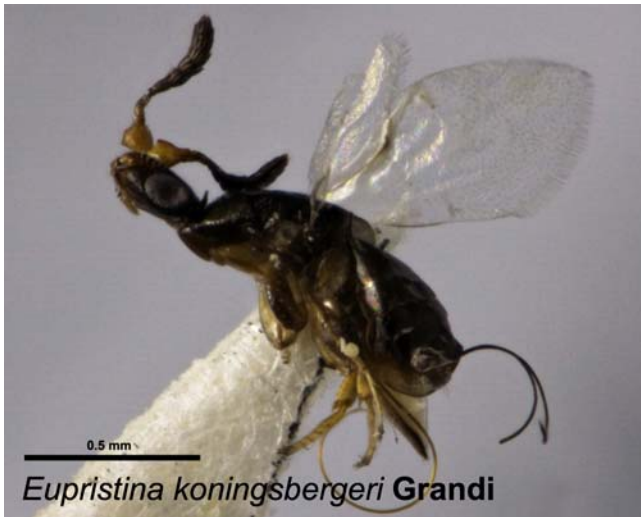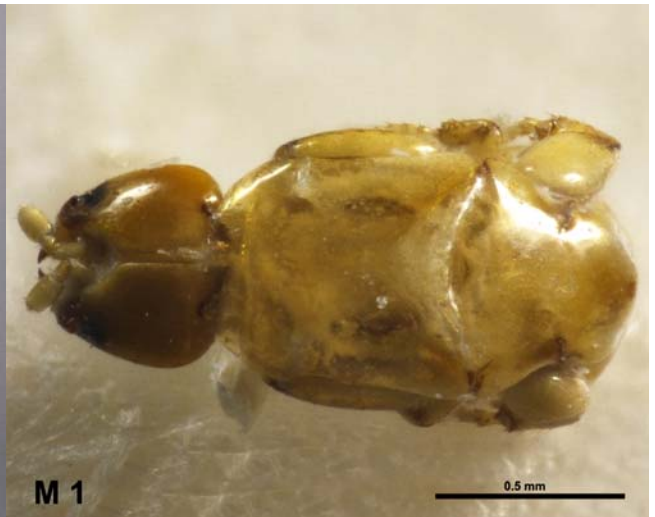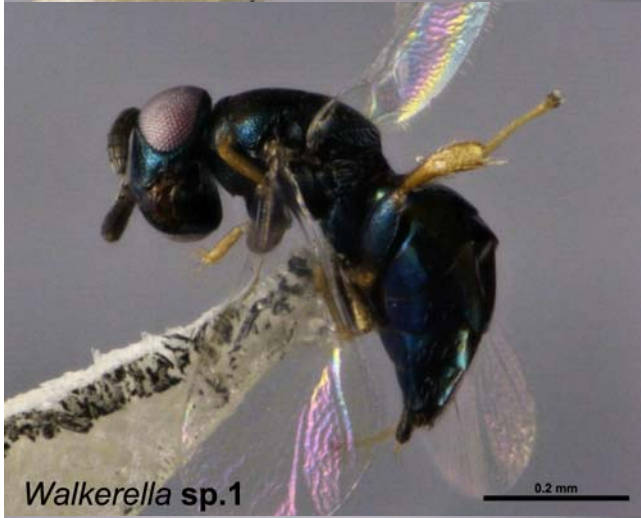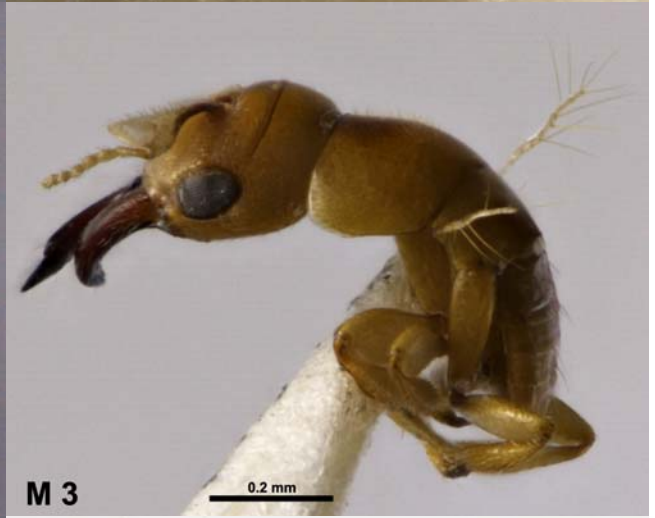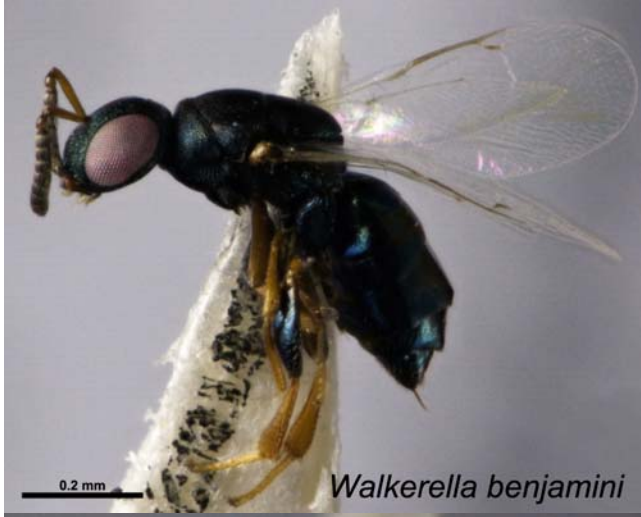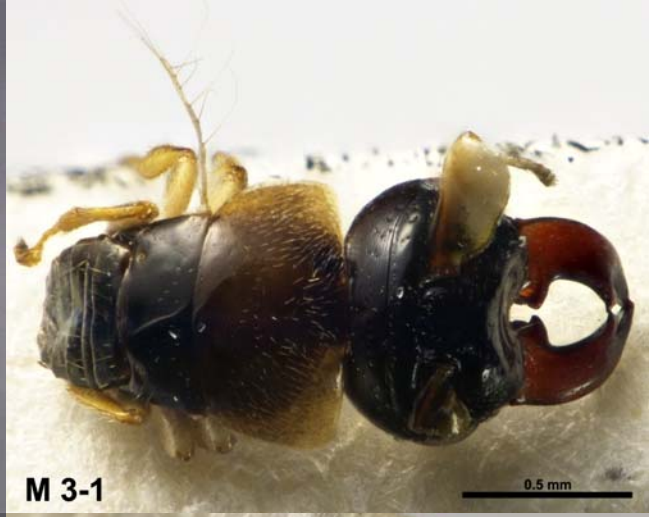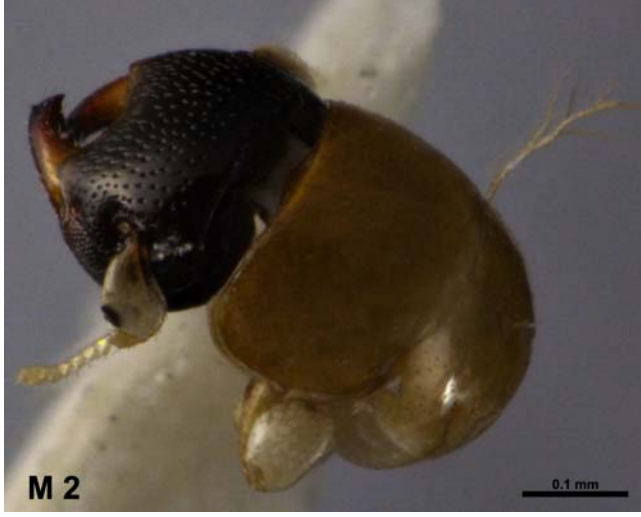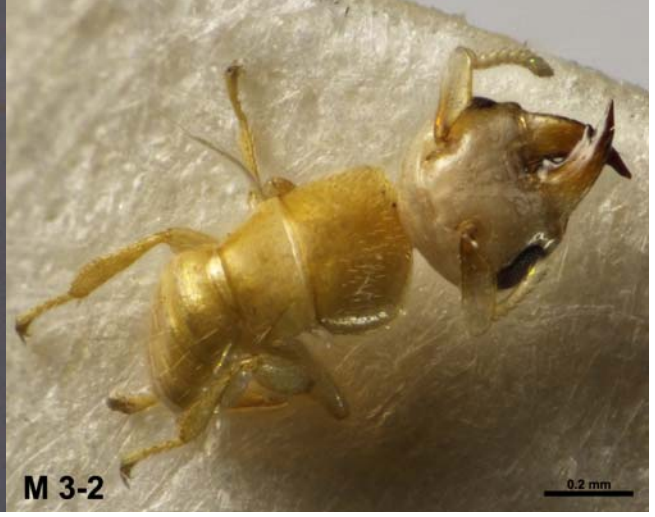



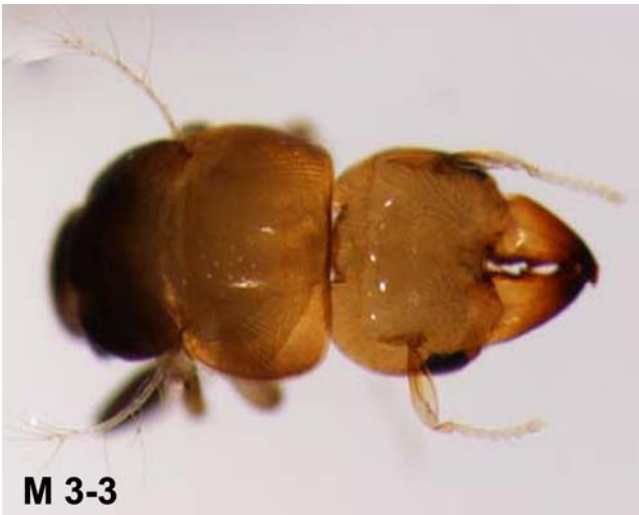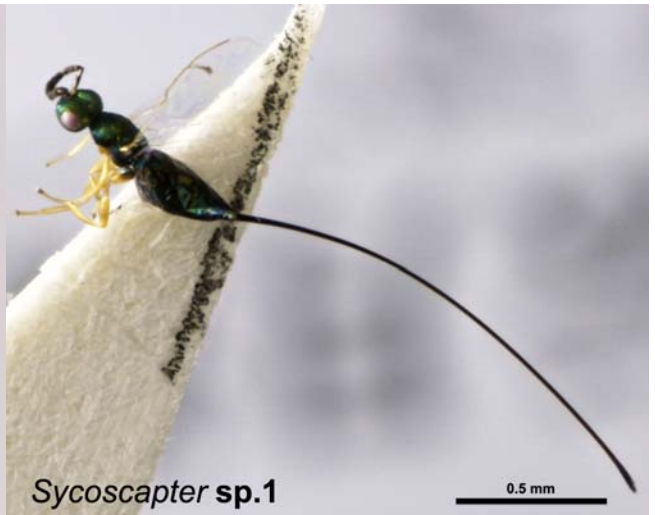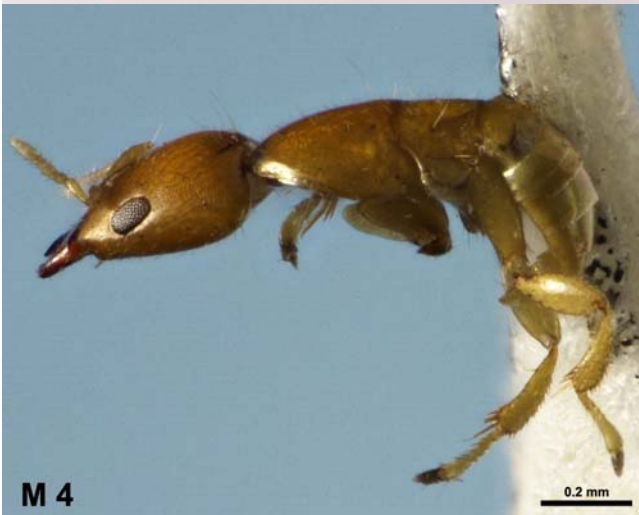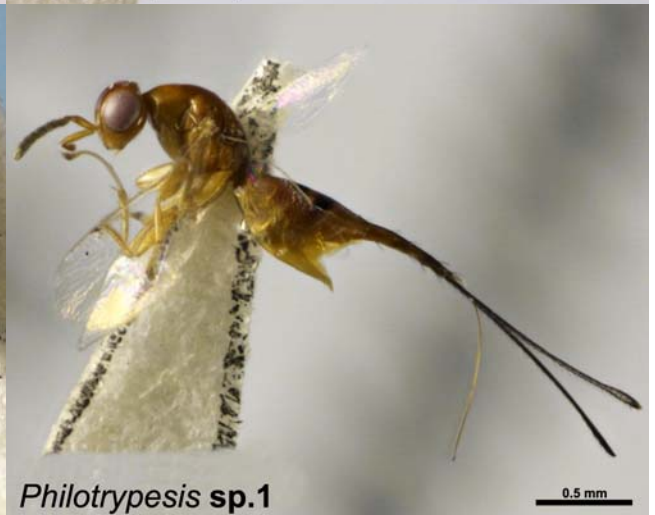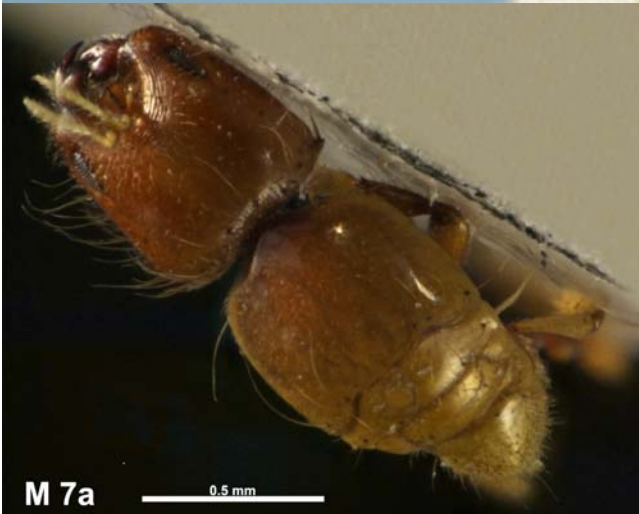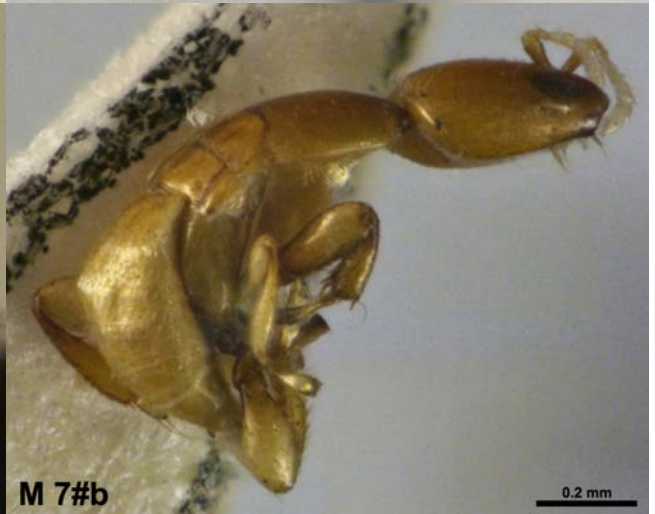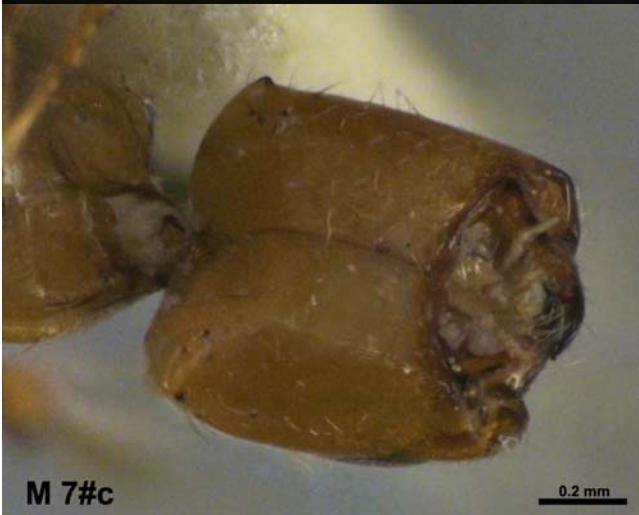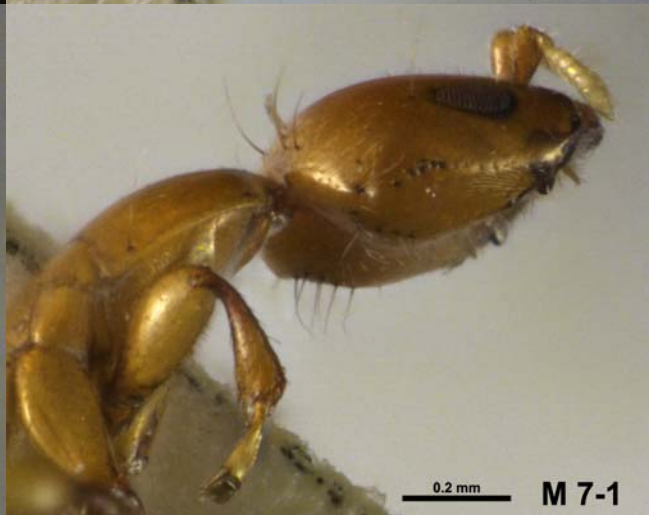

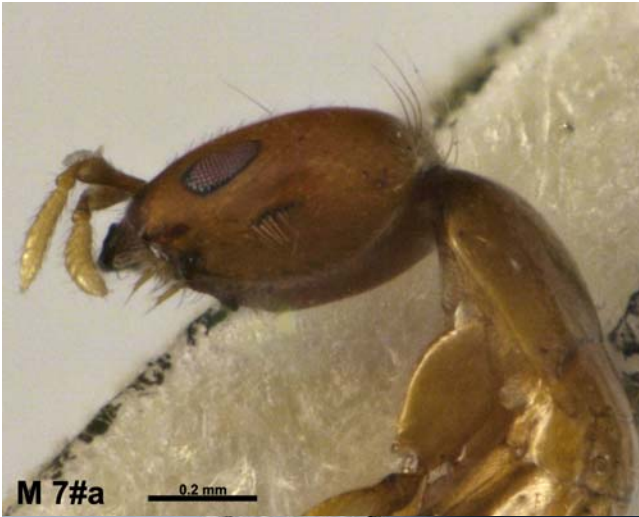

M 7#a

0.2 mm

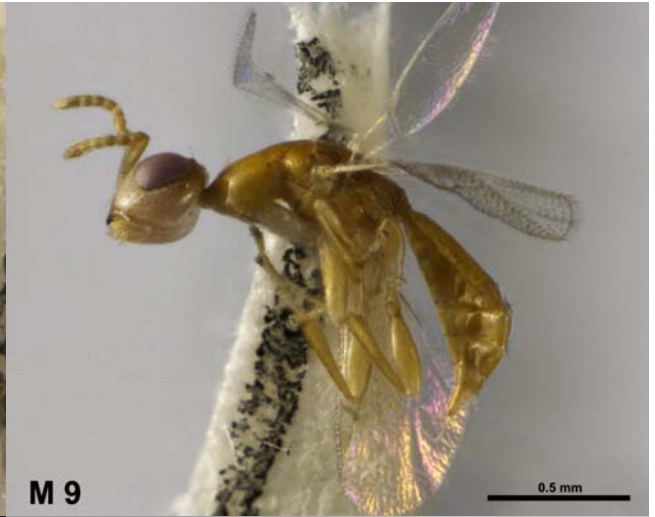

M 9

0.5 mm

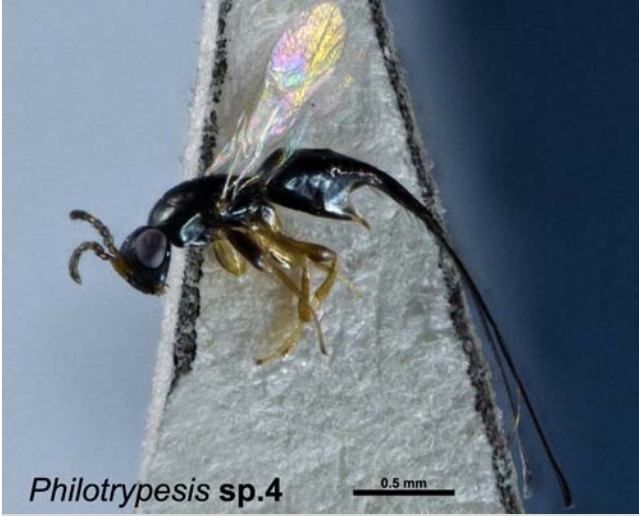

*Philotrypesis* sp.4

0.5 mm

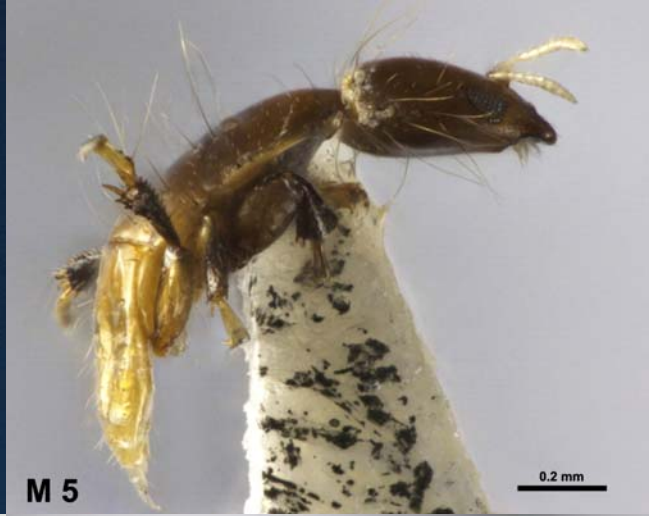

M 5

0.2 mm

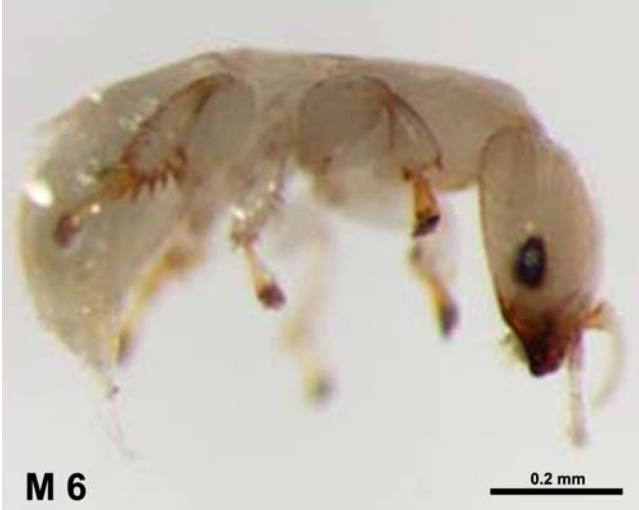

M 6

0.2 mm

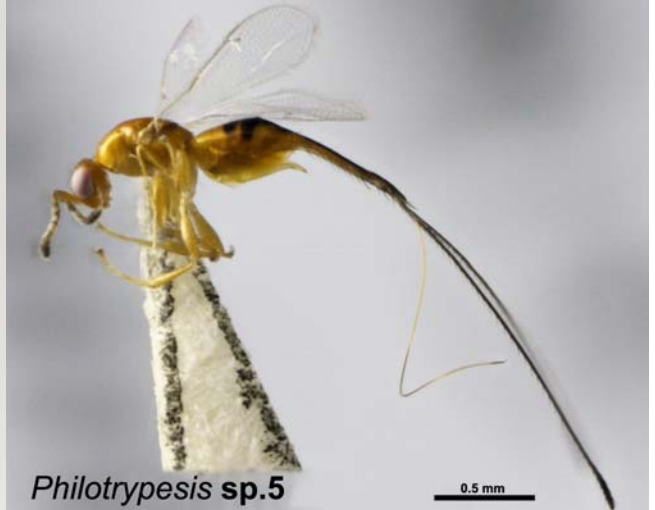

*Philotrypesis* sp.5

0.5 mm

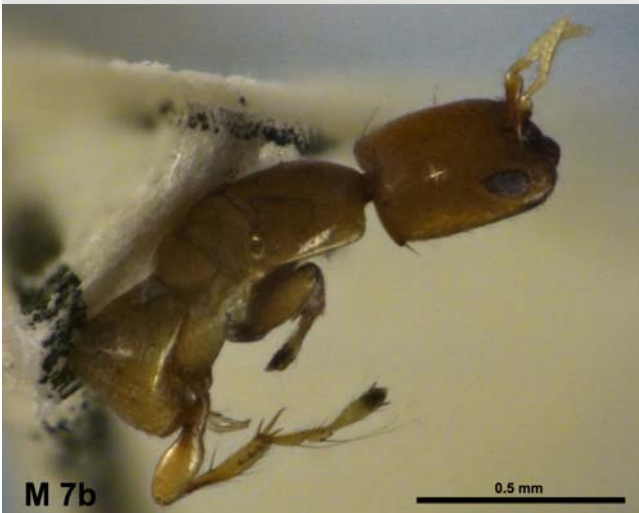

M 7b

0.5 mm

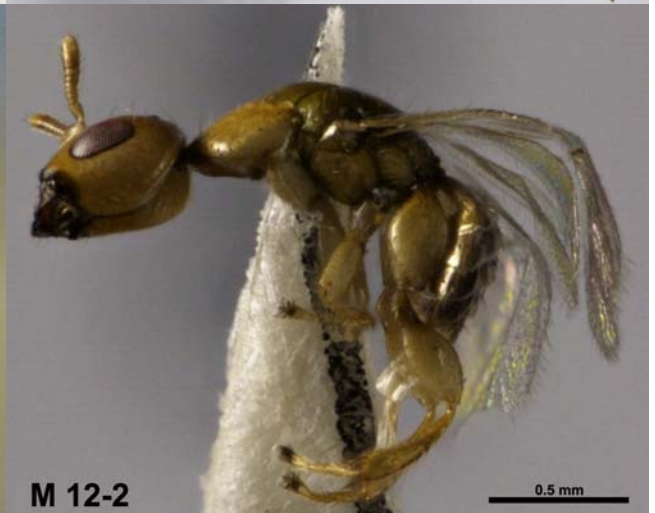

M 12-2

0.5 mm



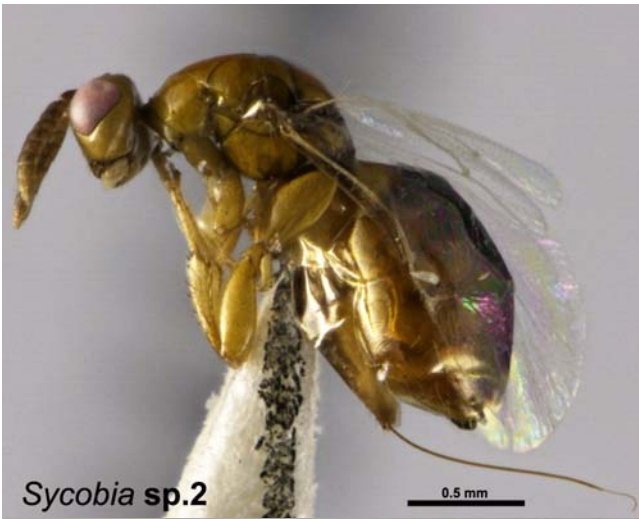

*Sycobia* sp.2

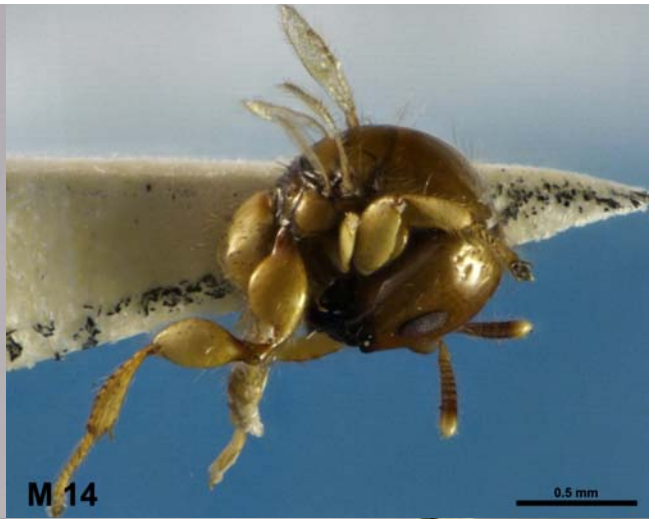

M 14

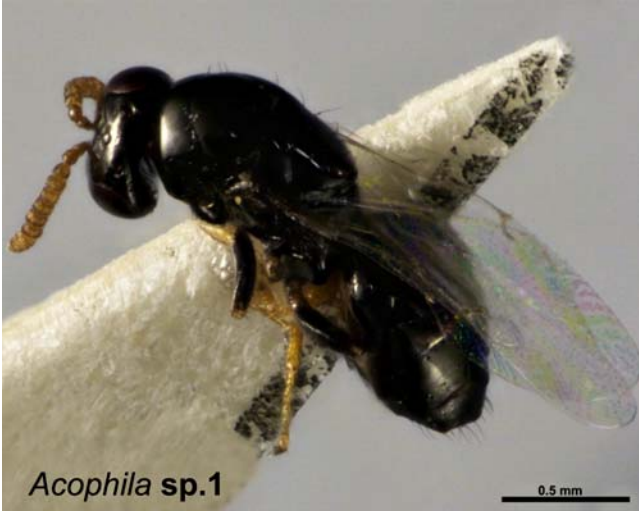

*Acophila* sp.1

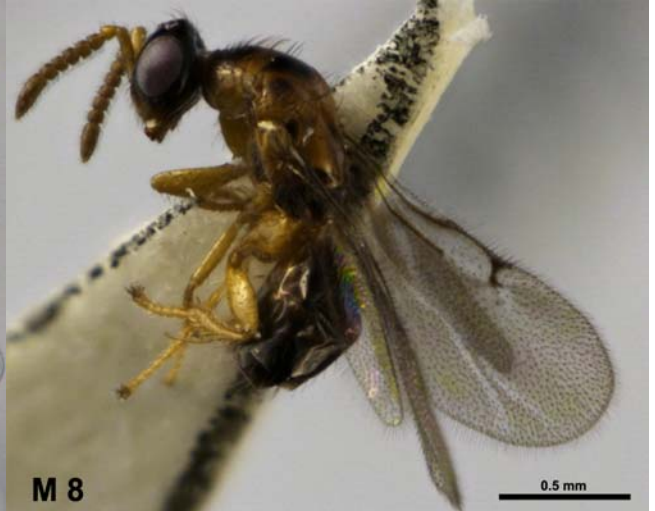

M 8

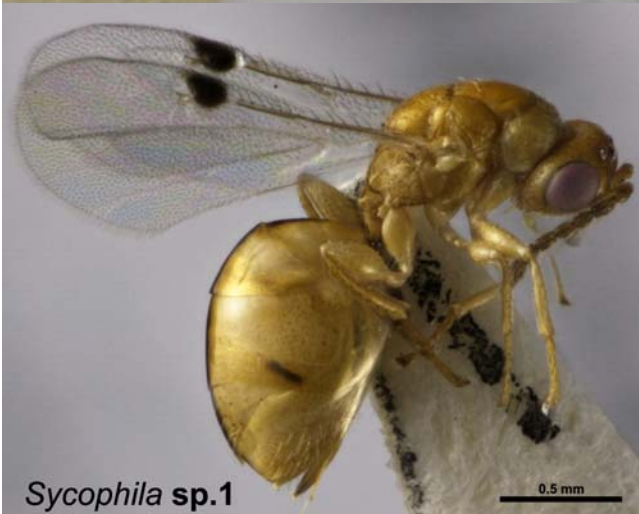

*Sycophila* sp.1

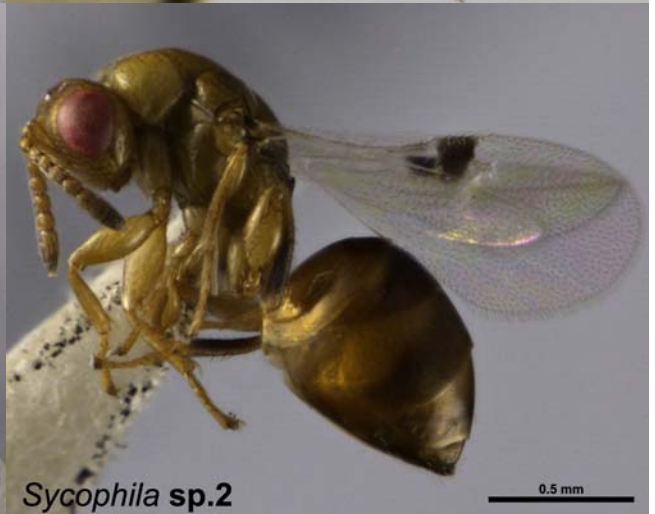

*Sycophila* sp.2

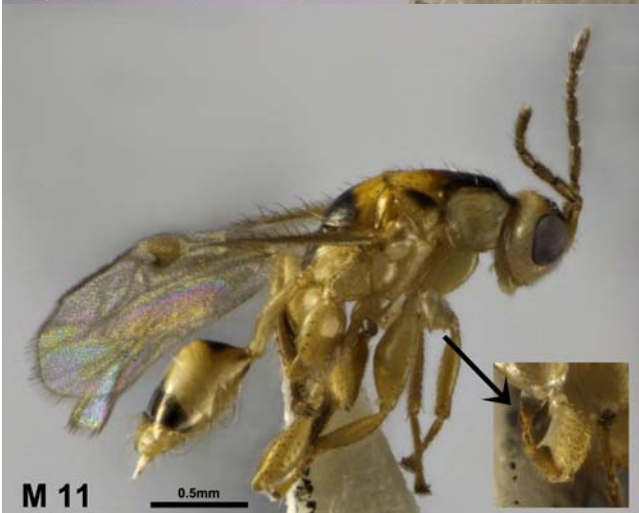

M 11

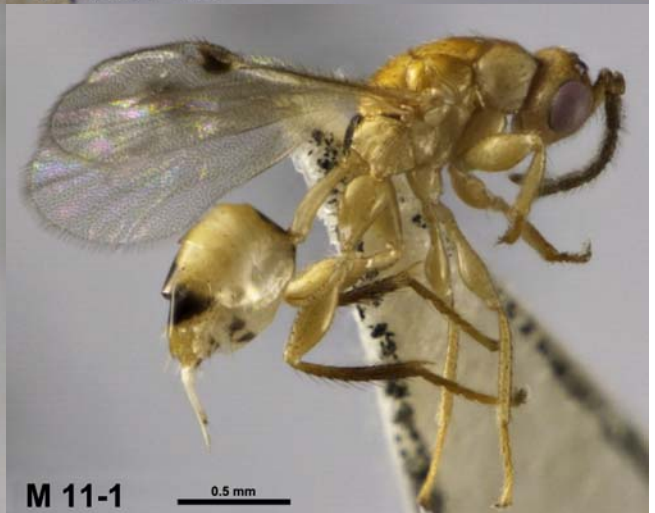

M 11-1

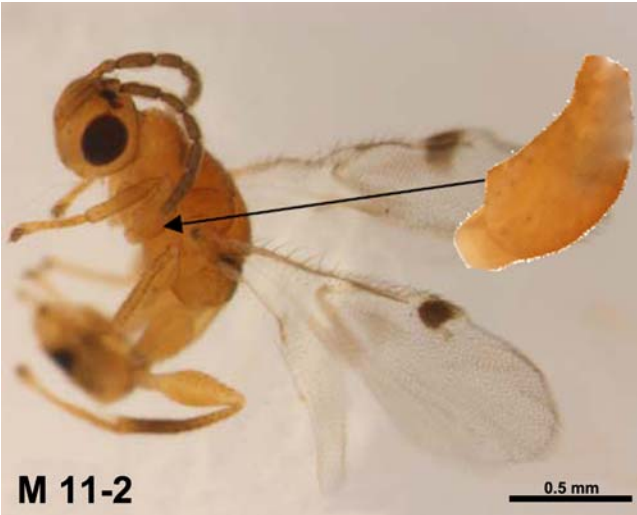

**M 11-2**

0.5 mm

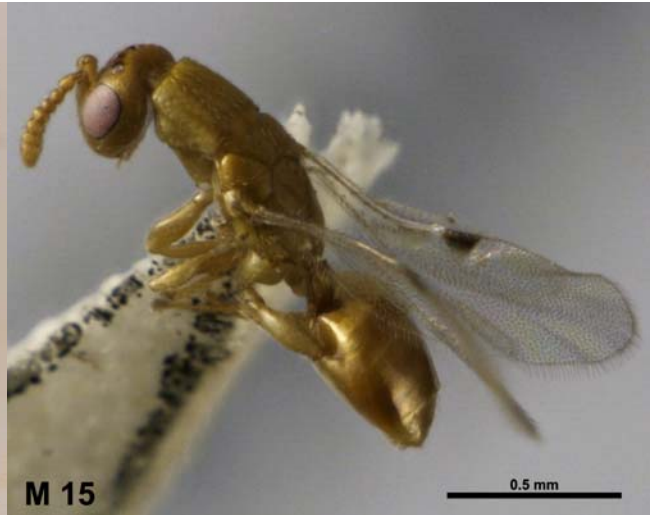

**M 15**

0.5 mm

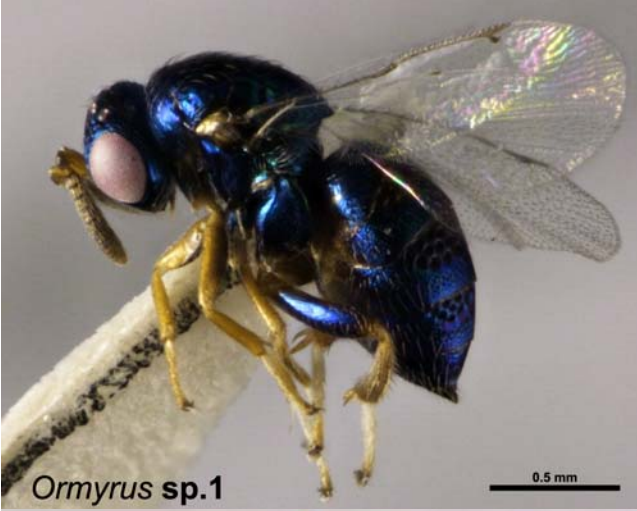

*Ormyrus* sp.1

0.5 mm

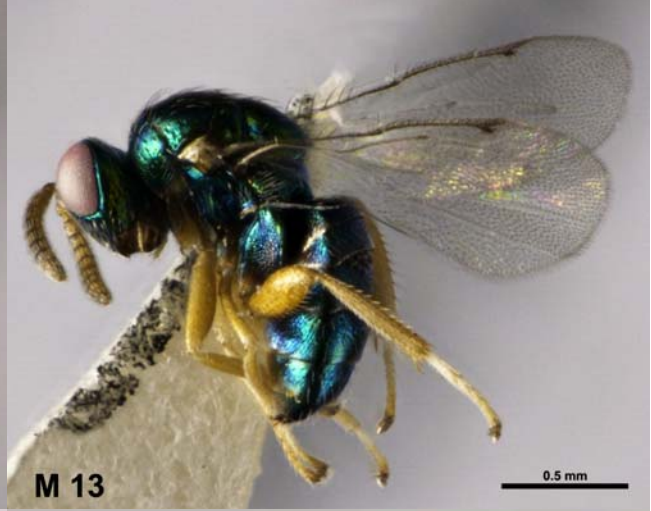

**M 13**

0.5 mm

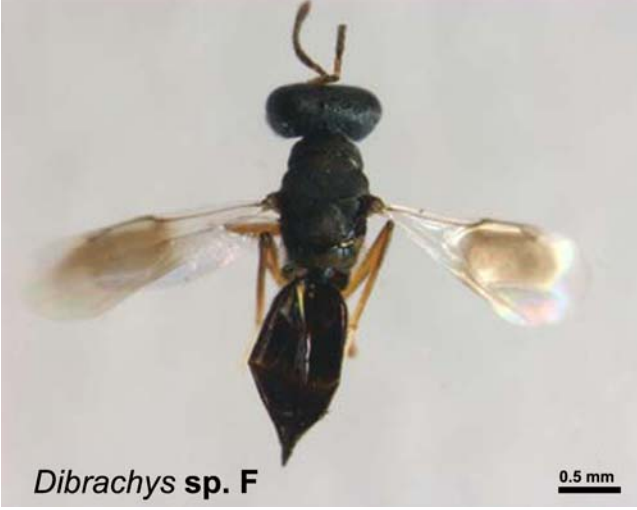

*Dibrachys* sp. F

0.5 mm

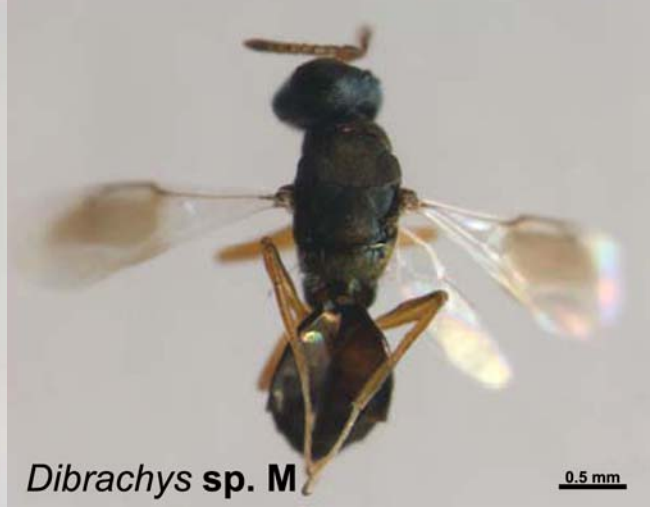

*Dibrachys* sp. M

0.5 mm
